# Supplementary material
Source: MDPI journal article supplement (https://www.mdpi.com/2673-9992/20/1/7)
Supplement: s1 [file s1 › msf-2385151-supplementary.pdf]

Supplementary Materials

# Potential Candidate Gene and Underlying Molecular Mechanism Involving in Tumorigenesis of Endometriosis-Associated Ovarian Cancer (EAOC) in Asian Populations <sup>†</sup>

Rut Christine Inggriani <sup>1</sup>, Che-Chang Chang <sup>2,3</sup> and Wei-Chung Vivian Yang <sup>2,3,4,\*</sup>

<sup>1</sup> Graduate Institute of Biomedical Informatics, College of Medical Science and Technology, Taipei Medical University, Taipei City 110, Taiwan; m610110001@tmu.edu.tw

<sup>2</sup> International Ph.D. Program for Translational Science, College of Medical Science and Technology, Taipei Medical University, Taipei City 110, Taiwan; ccchang168@tmu.edu.tw

<sup>3</sup> The Ph.D. Program for Translational Medicine, College of Medical Science and Technology, Taipei Medical University, Taipei City 110, Taiwan

<sup>4</sup> Center for Reproductive Medicine, Taipei Medical University Hospital, Taipei City 112, Taiwan

\* Correspondence: vyang@tmu.edu.tw

<sup>†</sup> Presented at the 3rd International Electronic Conference on Cancers: New Targets for Cancer Therapies, 16–30 March 2023; Available online: <https://iecc2023.sciforum.net/>.

**Citation:** Inggriani, R.C.; Chang, C.-C.; Yang, W.-C. Potential Candidate Gene and Underlying Molecular Mechanism Involving in Tumorigenesis of Endometriosis-Associated Ovarian Cancer (EAOC) in Asian Populations. *Med. Sci. Forum* **2023**, *20*, x. <https://doi.org/10.3390/xxxxx>

Academic Editor: Carlos Moreno

Published: 16 March 2023

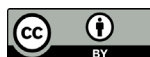

**Copyright:** © 2023 by the authors. Submitted for possible open access publication under the terms and conditions of the Creative Commons Attribution (CC BY) license (<https://creativecommons.org/licenses/by/4.0/>).

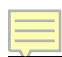**Table S1.** Selected Whole Exome Sequencing (WES) data from published articles.

| Reference | Study Location | Study Design                                          | Subjects | Diagnosis                    | Samples | Tissue Sampling                                               |
|-----------|----------------|-------------------------------------------------------|----------|------------------------------|---------|---------------------------------------------------------------|
| [8]       | Japan          | WES in discovery cohort                               | 13       | Endometriosis                | 13      | endometriotic epithelium (ectopic endometriotic)              |
|           |                |                                                       | 6        | Non-endometriosis*           | 5       | uterine endometrial epithelium                                |
| [9]       | China          | WES for mutational landscape in cohort                | 16       | Endometriosis                | 6       | uterine endometrial epithelium                                |
|           |                |                                                       | 22       |                              | 16      | Eutopic                                                       |
| [10]      | Taiwan         | 410 cancer-related gene sequencing in cohort patients | 22       | Epithelial ovarian cancer    | 16      | Ectopic                                                       |
|           |                |                                                       | 23       |                              | 22      | Endometrioid                                                  |
| [11]      | China          | WES in cohort                                         | 42       | ovarian clear cell carcinoma | 23      | Clear Cell                                                    |
| [12]      | Korea          | WES use cohort patient for genomic landscape          | 15       | ovarian clear cell carcinoma | 84      | ovarian tissues (both clear cell and adjacent normal tissues) |
|           |                |                                                       |          |                              | 5       | tissue associated with endometriosis                          |
|           |                |                                                       |          |                              | 10      | tissue non-associated endometriosis                           |

\* Non-endometriosis = Ovarian cystadenoma, Ovarian fibroma, Myoma uteri.

**Table S2.** Microarray Data Collection Information.

| GEO Series | Tissue Samples                              | Samples | Sample Characteristic                                 | Platform                                                            |
|------------|---------------------------------------------|---------|-------------------------------------------------------|---------------------------------------------------------------------|
| GSE7846    | HEECs (Human Endometrium Endothelial Cells) | 5       | Eutopic endothelium from a patient with endometriosis | GPL570 [HG-U133_Plus_2] Affymetrix Human Genome U133 Plus 2.0 Array |
|            |                                             | 5       | endothelium from normal control                       |                                                                     |
| GSE65986   | ovarian cancer tissue                       | 25      | Clear cell                                            | GPL570 [HG-U133_Plus_2] Affymetrix Human Genome U133 Plus 2.0 Array |
|            |                                             | 14      | Endometrioid                                          |                                                                     |

**Table S3.** Filtered exonic variants in genes of interest based on functional impact in WES data.

| Gene   | Histotype          | cDNA change | Protein Change | Variant ID   |
|--------|--------------------|-------------|----------------|--------------|
| MYH11  | *Eu- Endometriosis | c.323G>A    | p.R108Q        | -            |
|        | *Ec-Endometriosis  | c.808C>T    | p.R270W        | COSV55541820 |
|        | Endometrioid       | c.323G>A    | p.R108Q        | -            |
|        | Clear Cell         | c.4260G>C   | p.K1420N       | -            |
|        | Clear Cell         | c.4822G>A   | p.E1608K       | rs777768672  |
| KRT5   | *Ec-Endometriosis  | c.1127G>A   | p.G376D        | -            |
|        | Clear Cell         | c.992G>A    | p.R331H        | rs56729325   |
|        | Clear Cell         | c.1343G>A   | p.R448Q        | rs148276250  |
| PDGFRA | *Eu-Endometriosis  | c.2942G>A   | p.R981H        | rs368266633  |
|        | *Eu-Endometriosis  | c.2671C>T   | p.L891F        | rs759510574  |
|        | Endometrioid       | c.2450G>A   | p.R817H        | rs79948560   |
|        | Endometrioid       | c.2566T>G   | p.F856V        | -            |

\* Eu-Endometriosis (Eutopic endometriosis), Ec-Endometriosis (Ectopic endometriosis).

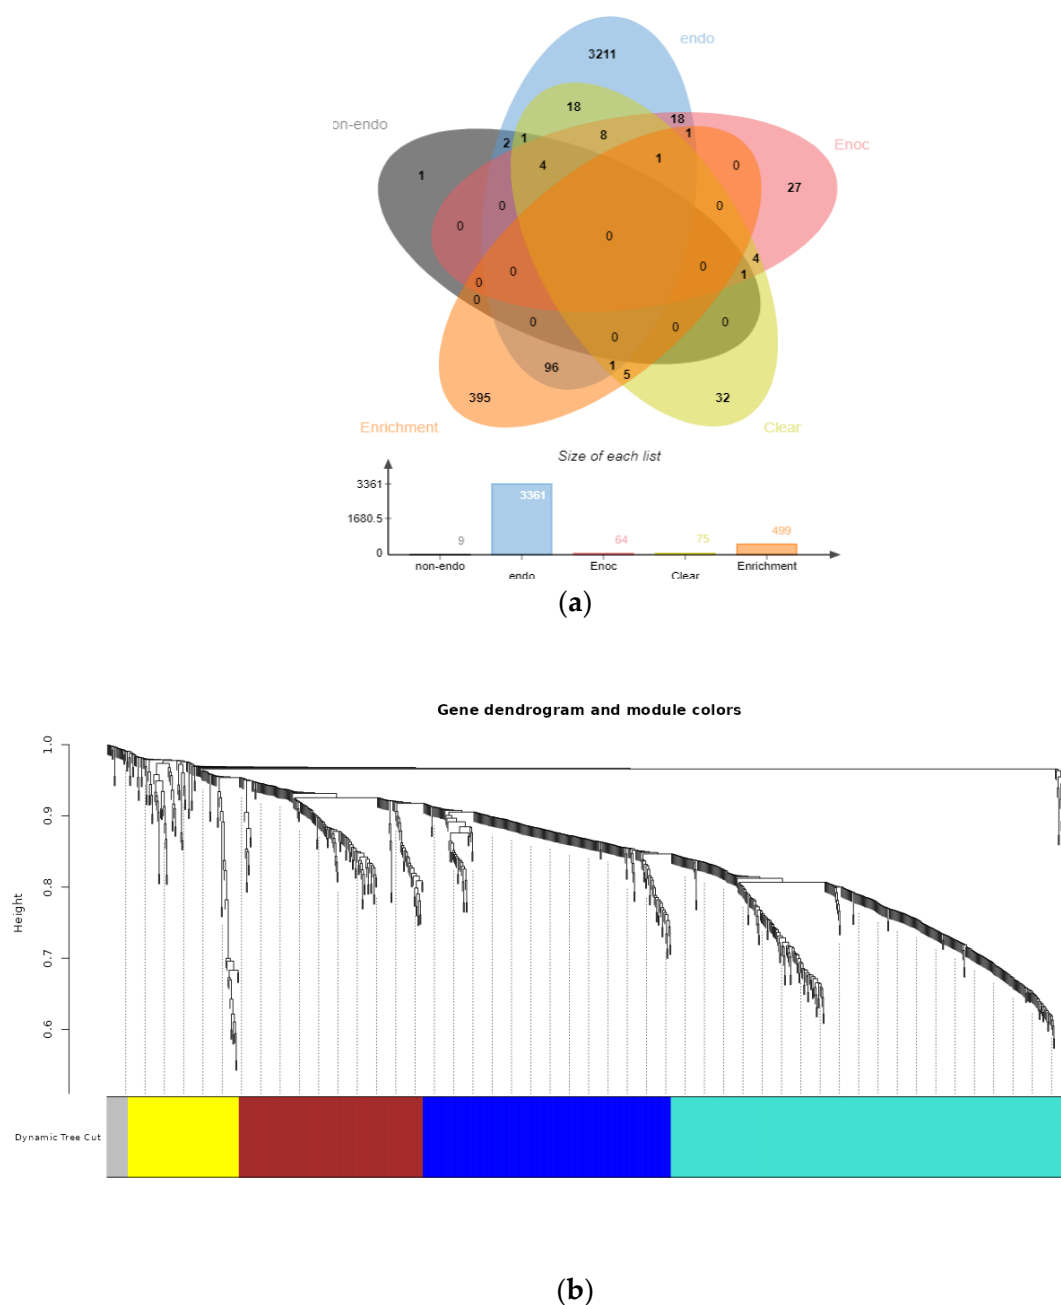

**Figure S1.** Co-expression network analysis using WGCNA package in iDEP. (a) Diagram Venn of overlapping gene interest between functional variant of WES data and co-expression network of mRNA expression; (b) Gene dendrogram and recognition module. Each module was given an individual color as an identifier, including ten different modules.

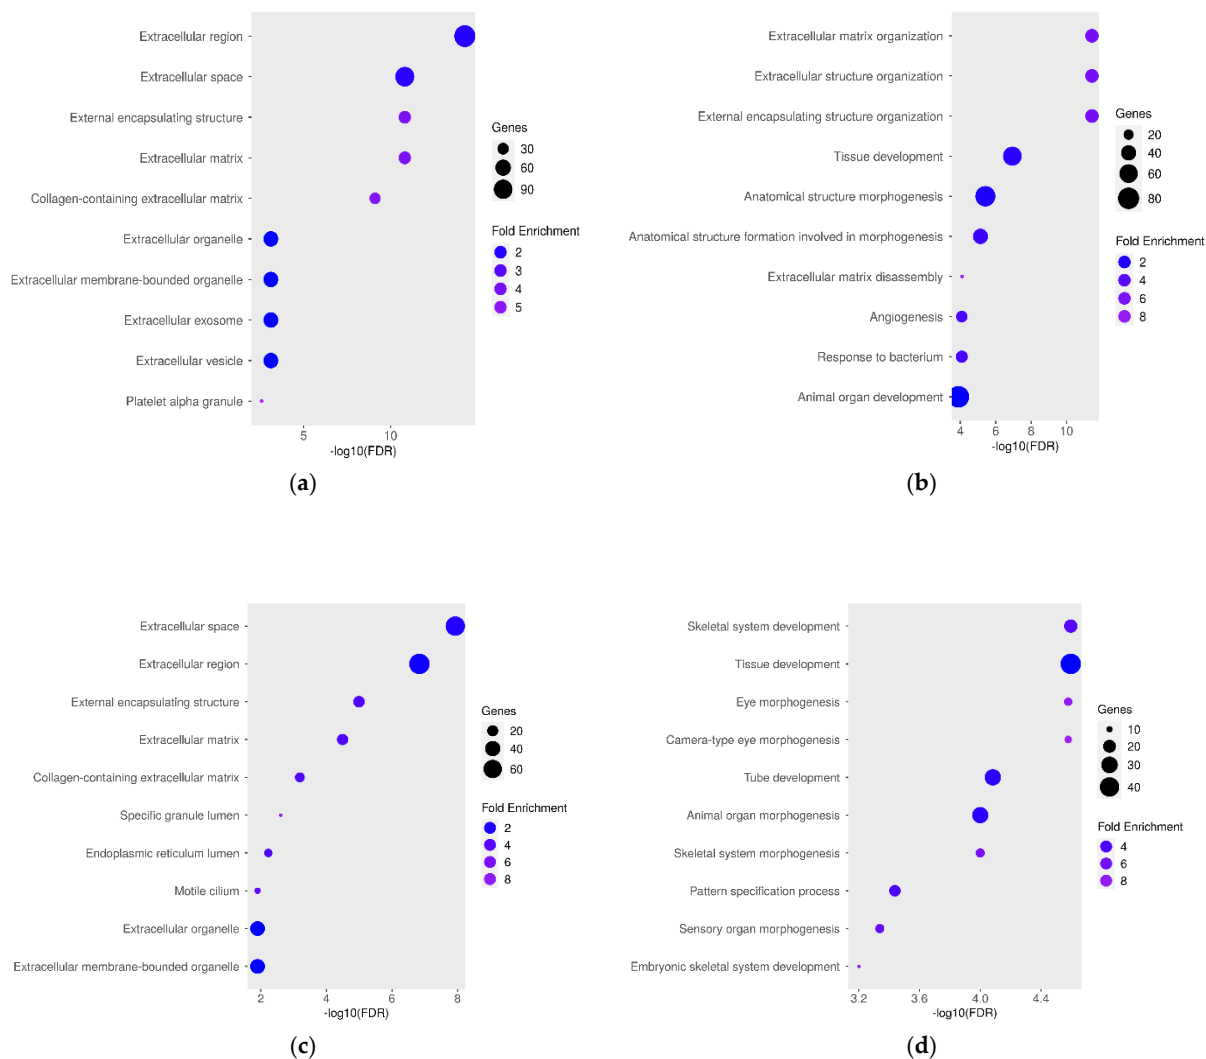

**Figure S2.** Bar plot of GO enrichment analysis for 2 modules (Brown and blue) in iDEP result. **(a)** Cellular Component bar plot of the hub genes identified in the blue module *PDGFRA*; **(b)** Molecular function bar plot of the hub genes identified in the blue module *PDGFRA*; **(c)** Cellular component of the hub genes identified in the brown module *KRT5* and *MYH11*; **(d)** Molecular function bar plot of the hub genes identified in brown module *KRT5* and *MYH11*.

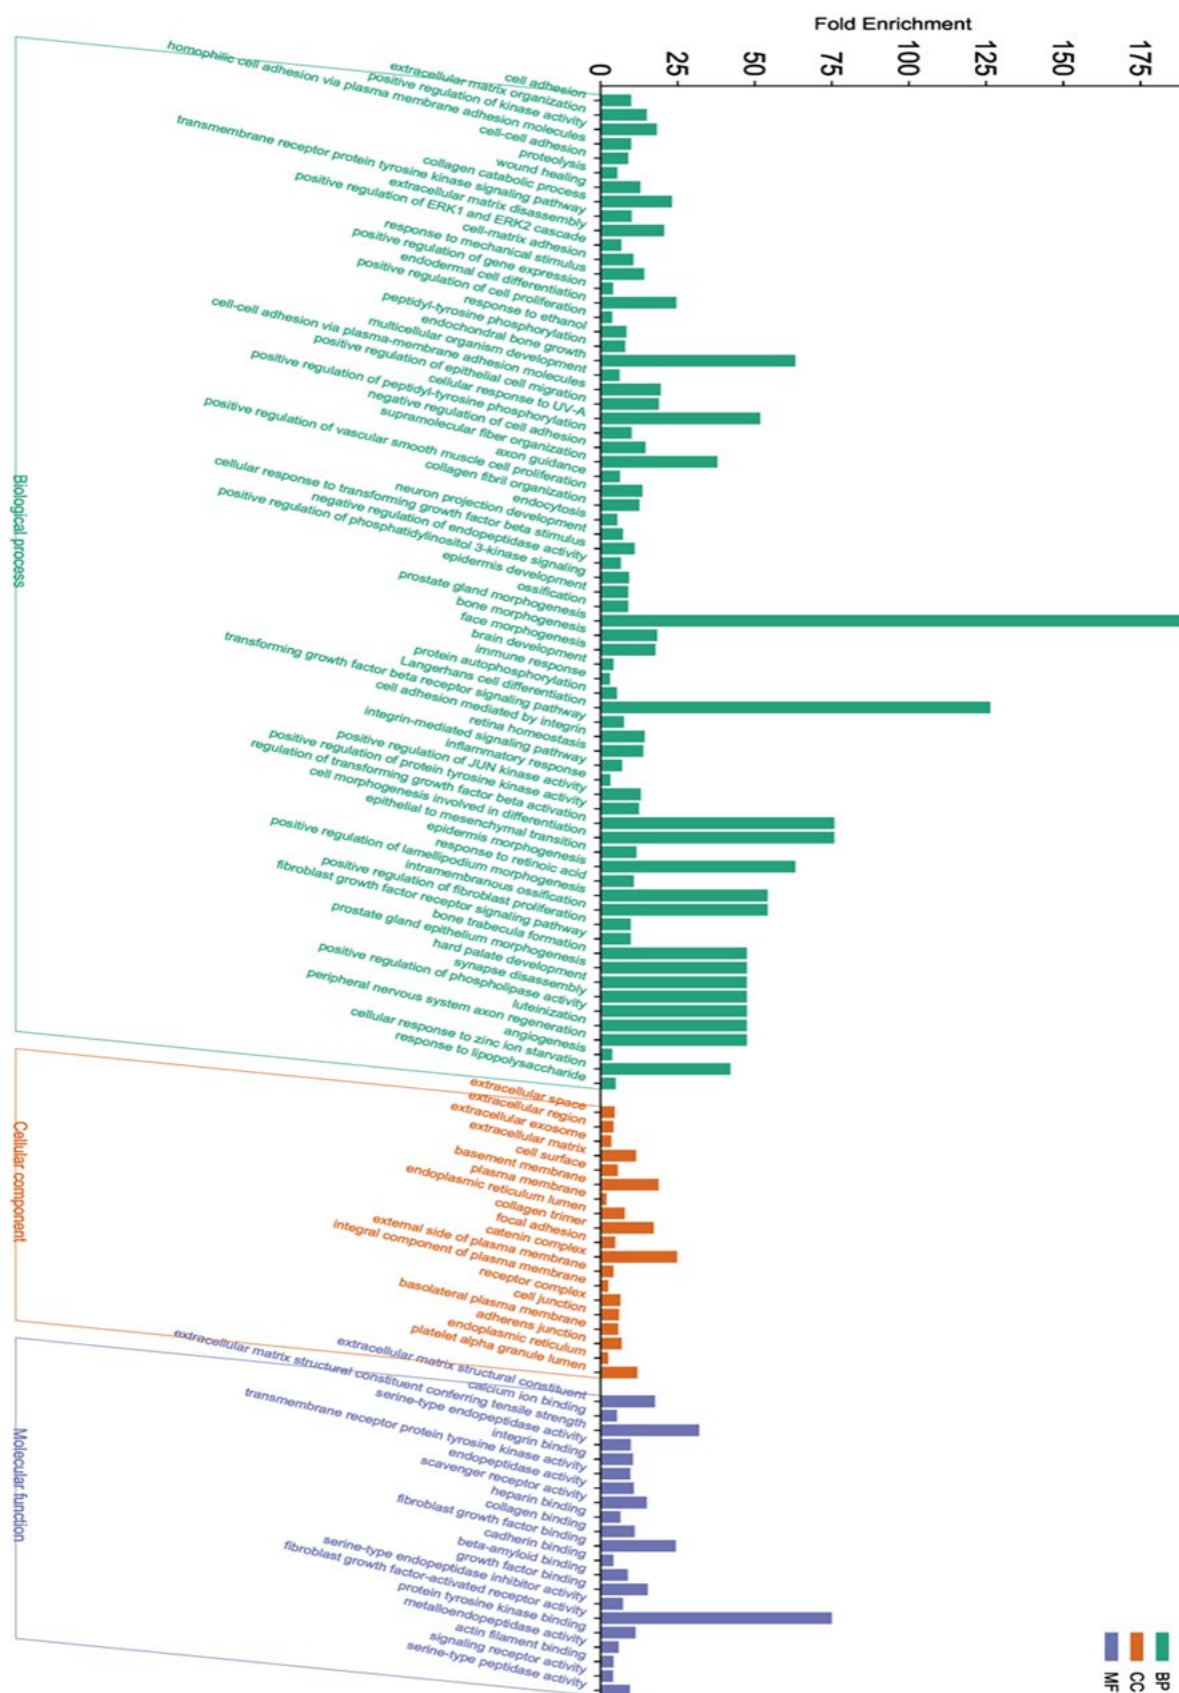

(a)

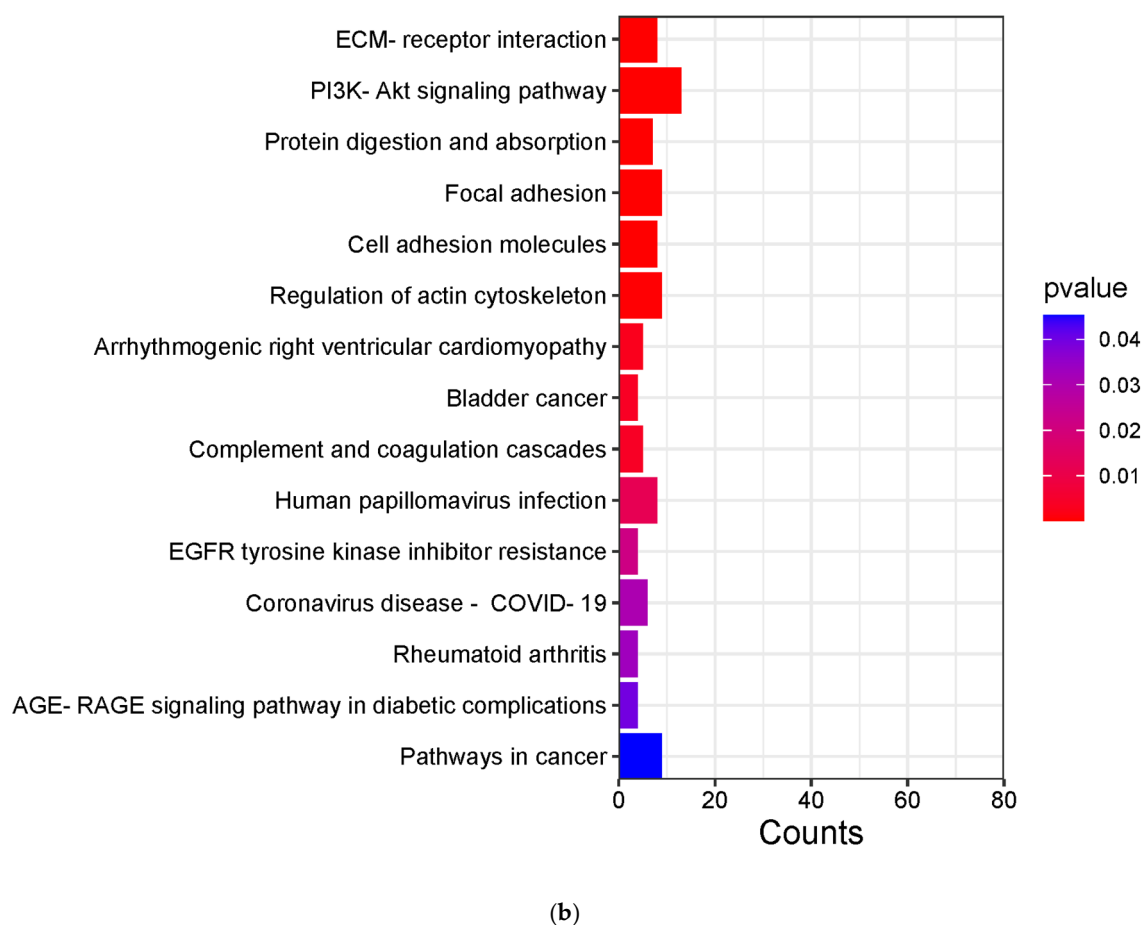

**Figure S3.** GO analysis and Hallmark pathway enrichment of 104 genes from overlapping WES and mRNA data in EAO. (a) GO analysis of overlapping genes in EAO visualized on a bar chart clustered by molecular functions, cellular component and biological process; (b) KEGG Hallmark pathway enrichment of overlapping gene in EAO visualized on a bar chart, showing number of shared genes (count) and *p* value.

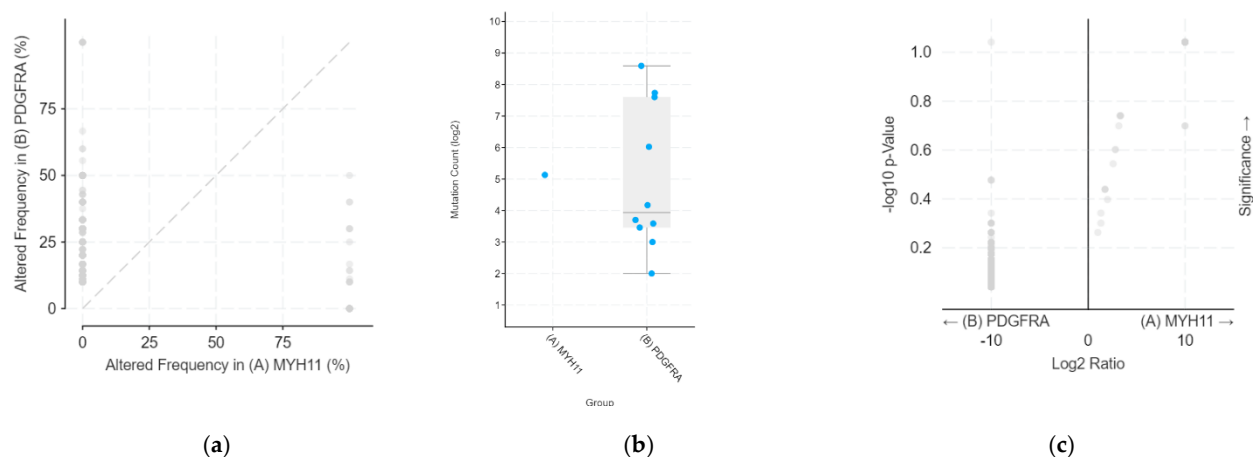

**Figure S4.** Summarize of cBioportal in GENIE cohort of Clear Cell Ovarian Carcinoma and Endometrioid Ovarian Carcinoma. (a) Altered frequency plot between *MYH11* and *PDGFRA*; (b) Mutation count plot between *MYH11* and *PDGFRA*; (c) Enrichment mutation between *MYH11* and *PDGFRA*.

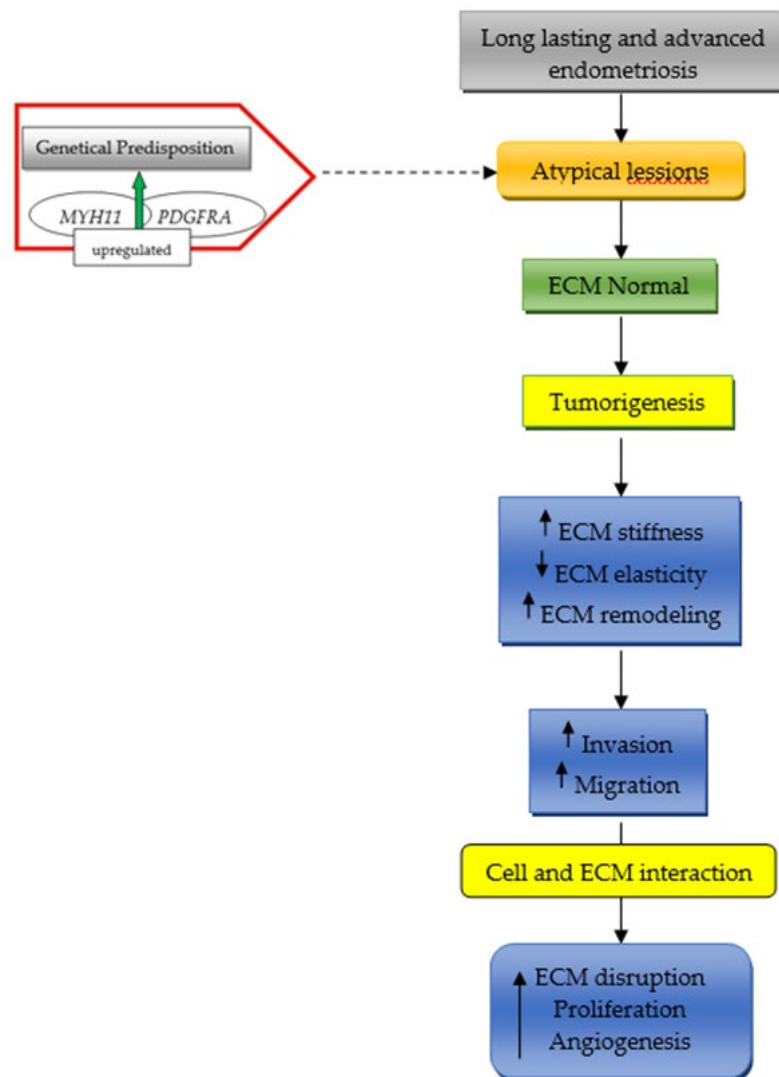

**Figure S5.** An overview of tumorigenesis involving genetic predisposition and PDGFRA in extracellular matrix (Adapted from Ref. [21]).
